# Supplementary figures and images for: Distinct DNA Methylation Patterns of Rheumatoid Arthritis Peripheral Blood and Synovial Tissue T Cells
Source: PubMed Central journal article supplement — ACR Open Rheumatol. 2021 Feb 5;3(3):127–32. doi: 10.1002/acr2.11231 (PMC7966880; doi:10.1002/acr2.11231), 2021-02-05

FLS

1672

12

28

2

268

759

81

Peripheral blood  
T cells

Synovial T cells

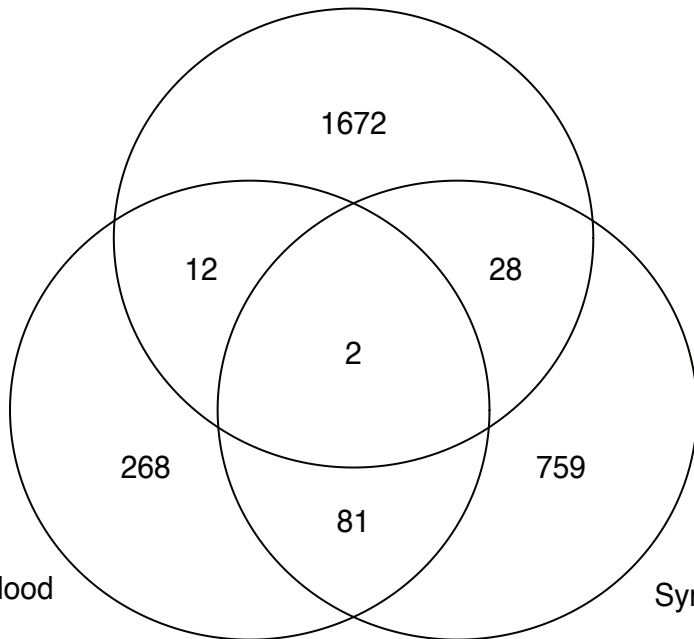

Supplement: ACR2-3-127-s001.pdf [file ACR2-3-127-s001.pdf]

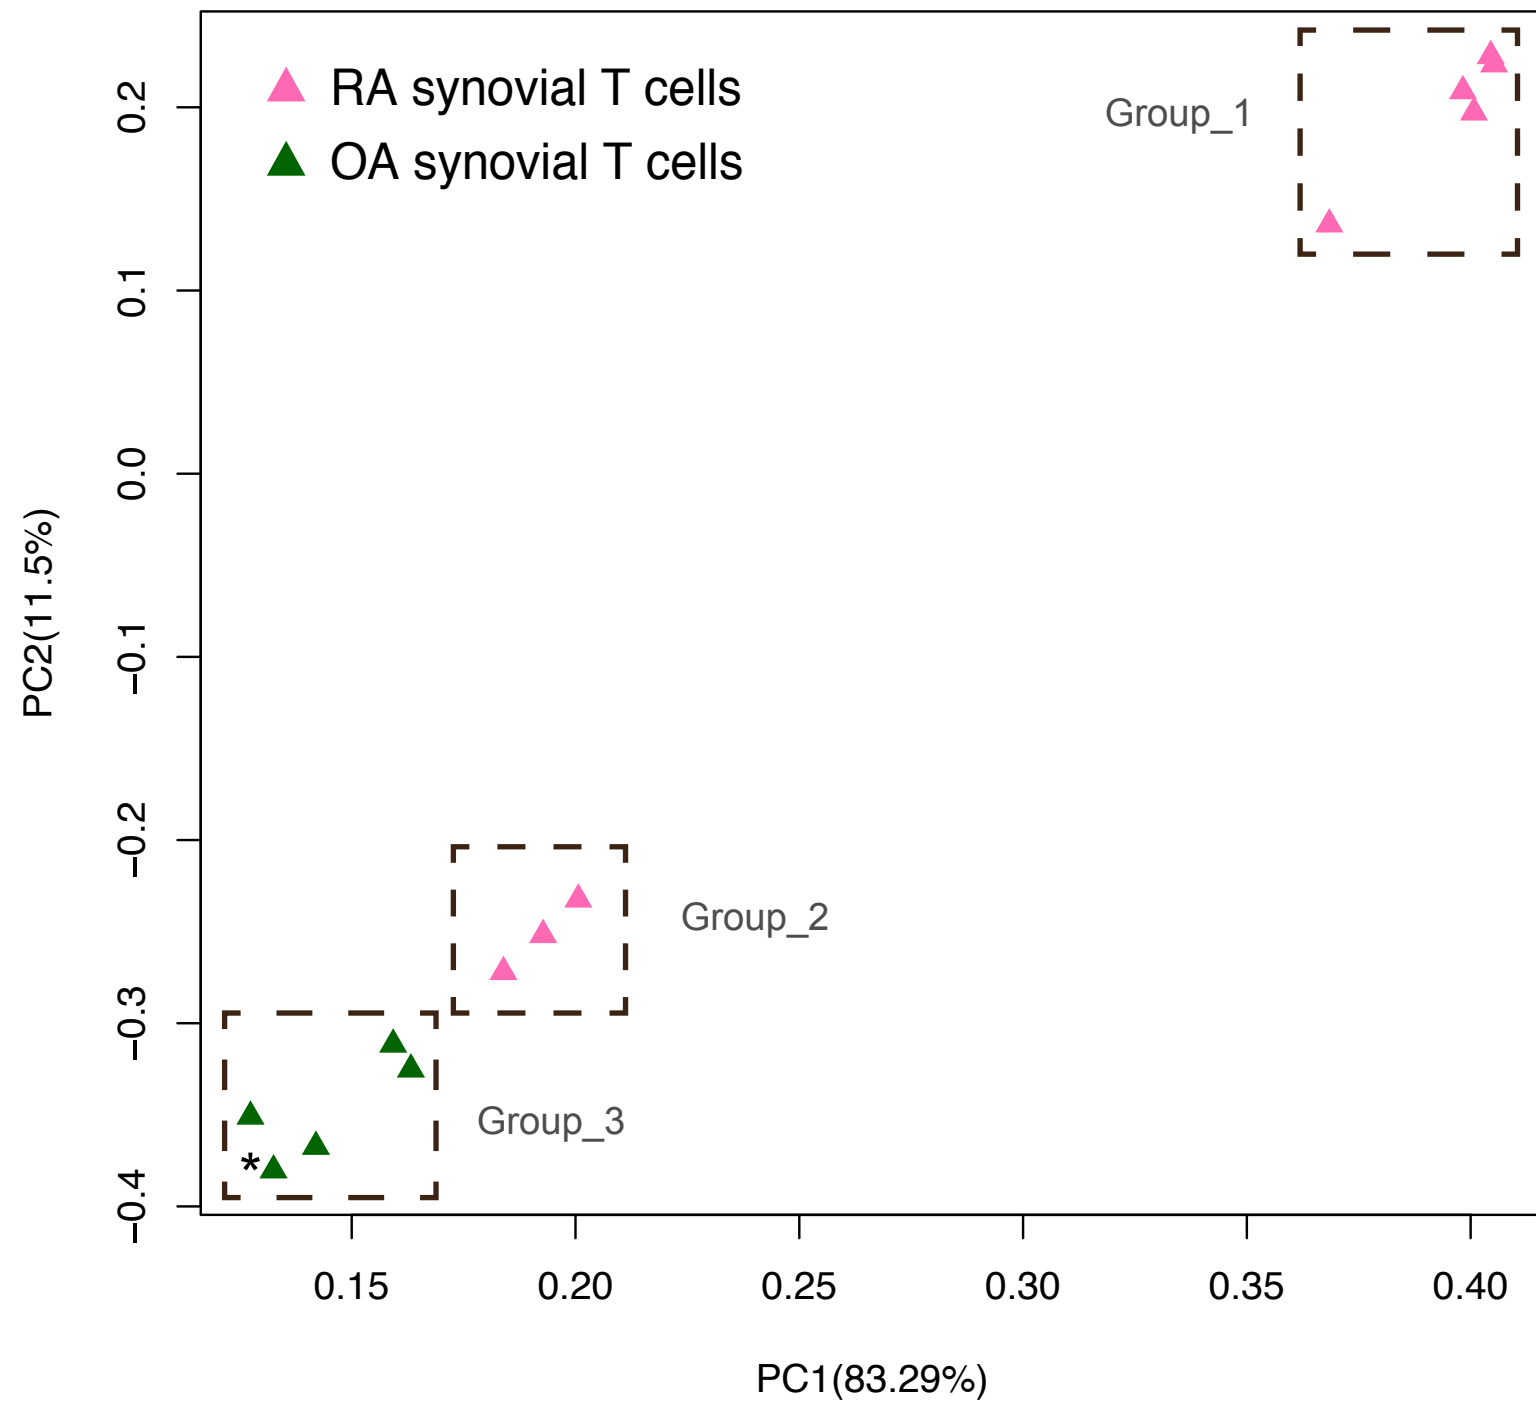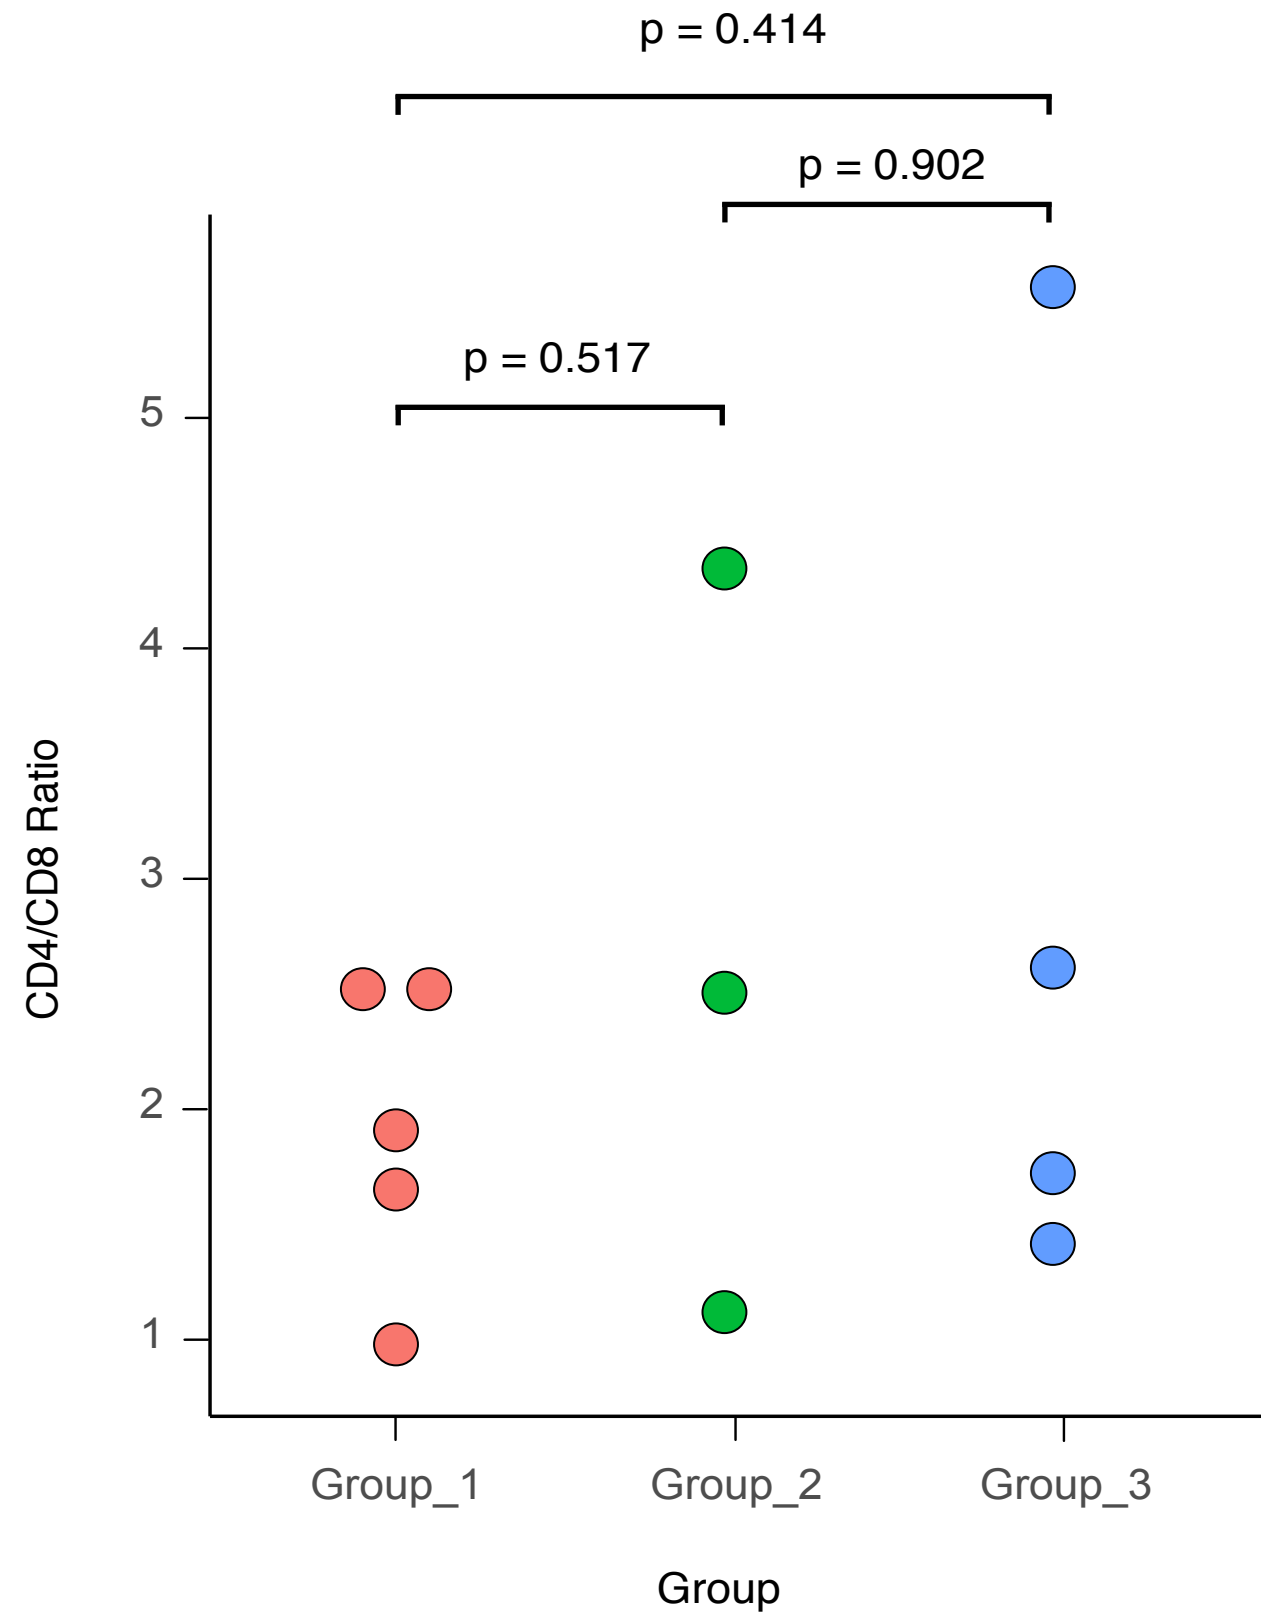

Supplement: ACR2-3-127-s002.pdf [file ACR2-3-127-s002.pdf]

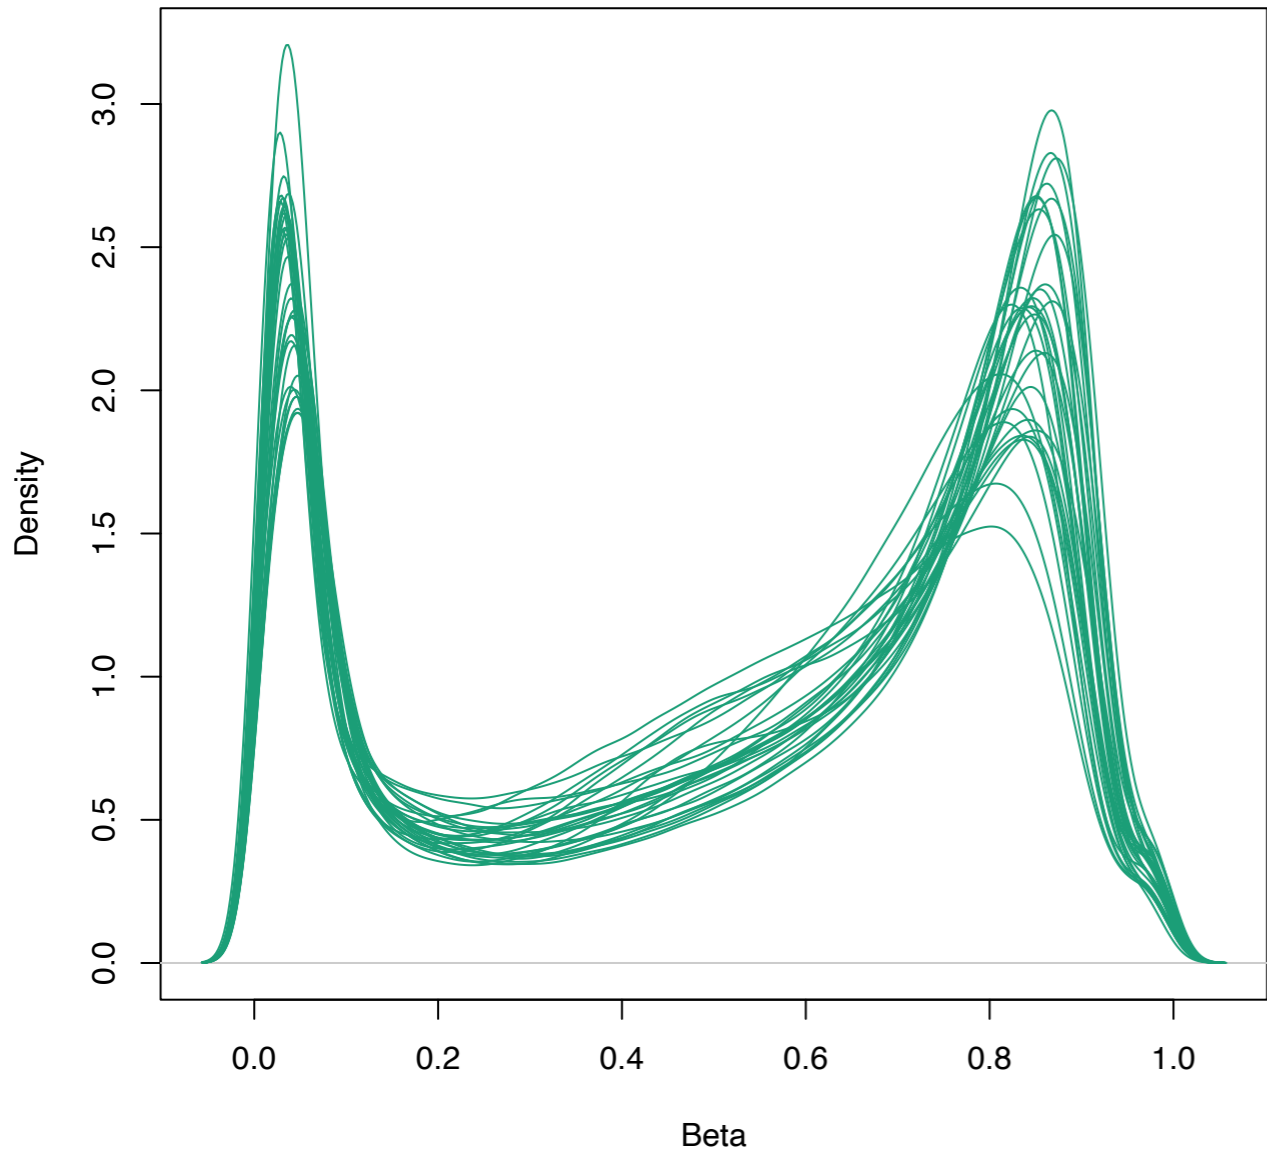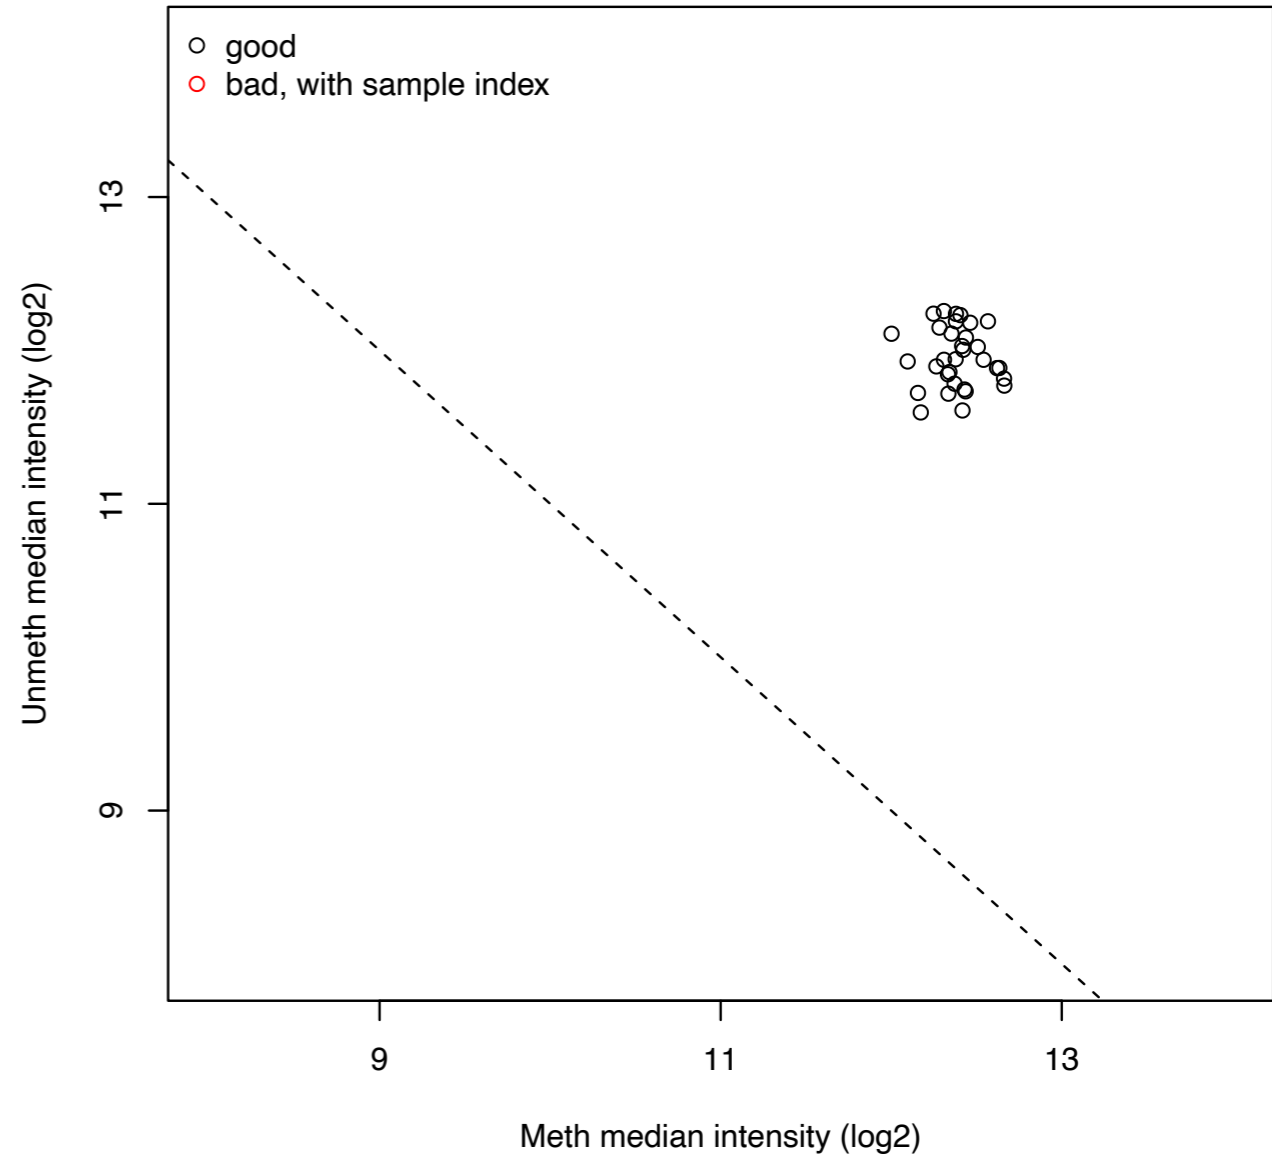

Supplement: ACR2-3-127-s004.pdf [file ACR2-3-127-s004.pdf]

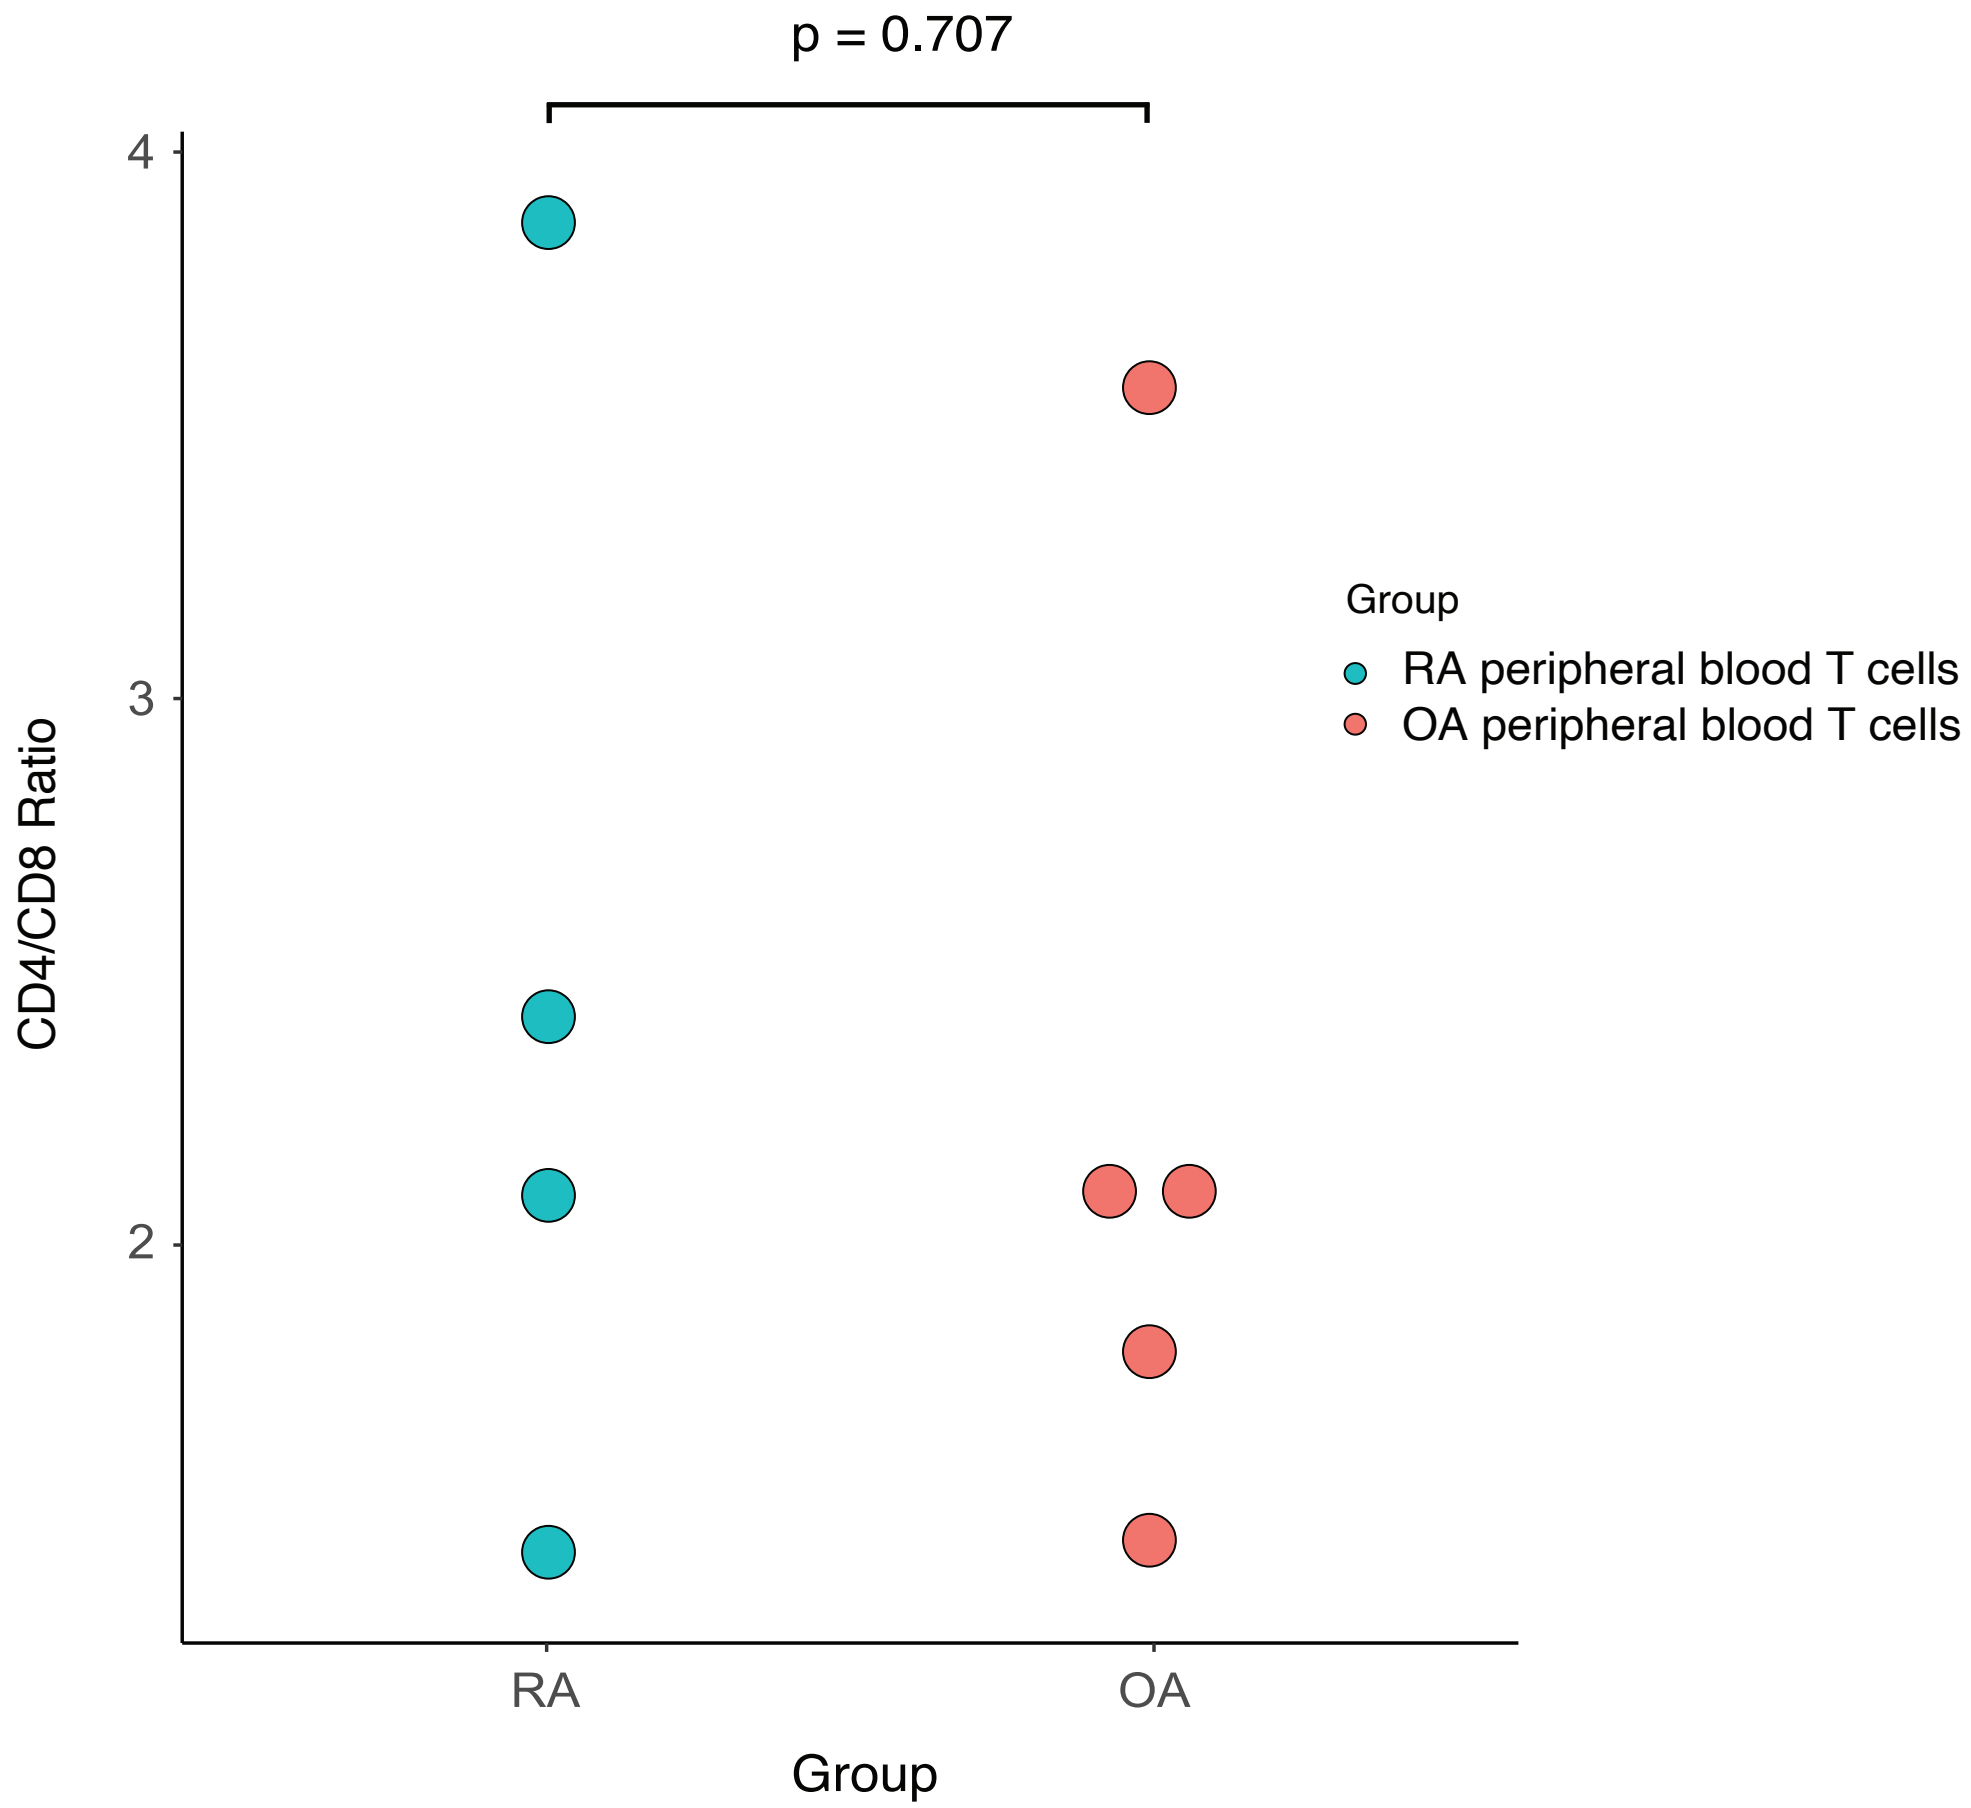

Supplement: ACR2-3-127-s005.pdf [file ACR2-3-127-s005.pdf]
